# Supplementary material
Source: HighWire-hosted journal article supplement (https://jnm.snmjournals.org/highwire/filestream/94575/field_highwire_adjunct_files/0/136663_Supplemental_Data.pdf)
Supplement: 136663_Supplemental_Data.pdf [file 136663_Supplemental_Data.pdf]

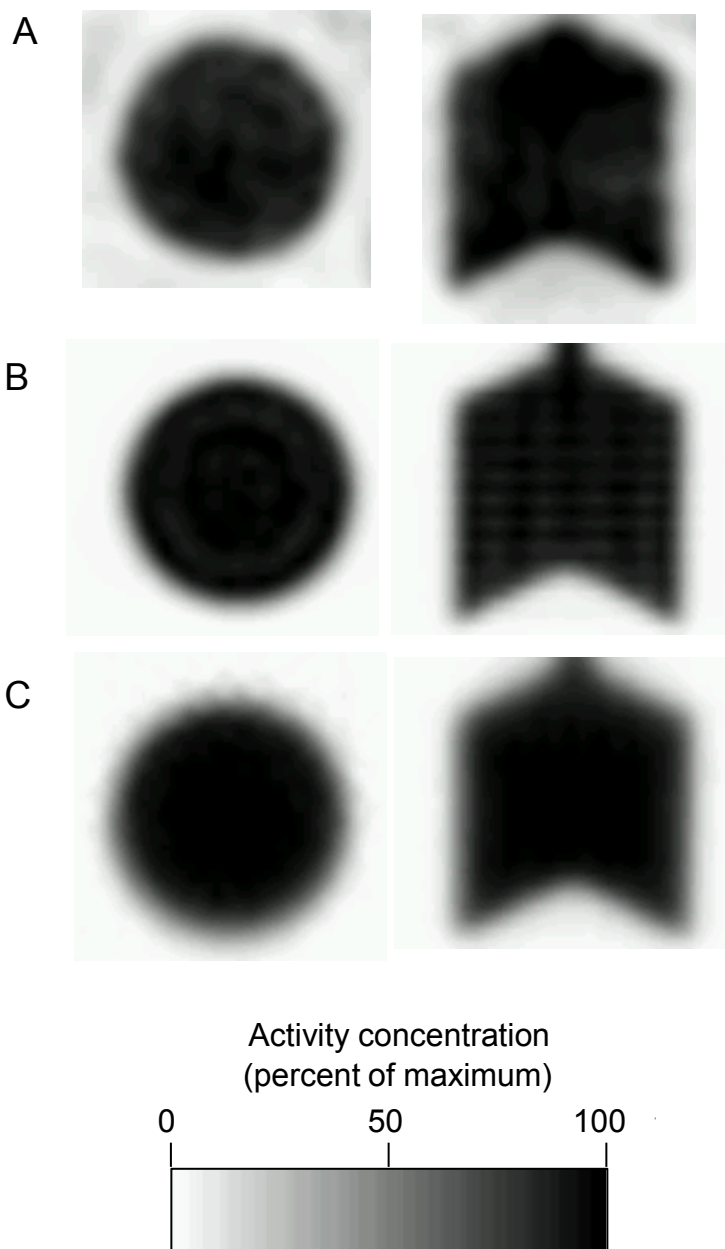

**Supplemental Figure 1.**

Images of  $^{18}\text{F}$  in a syringe. Two slices are shown in each case, individually scaled using a linear grey-scale. Data are from A) VECTor with 1.2 mm post-reconstruction smoothing, B) Focus120 using 3DMAP ( $\beta=0.03$ ), and C) Focus120 using FORE + FBP.

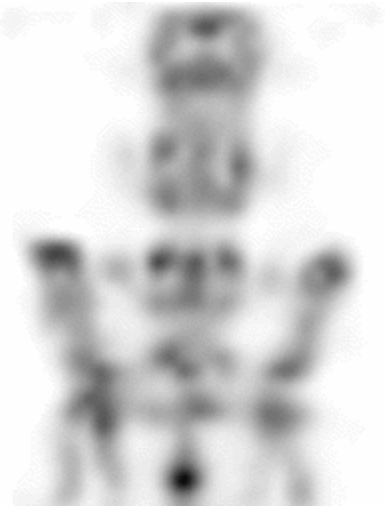

**VECTor  
(0.25 mm smooth)**

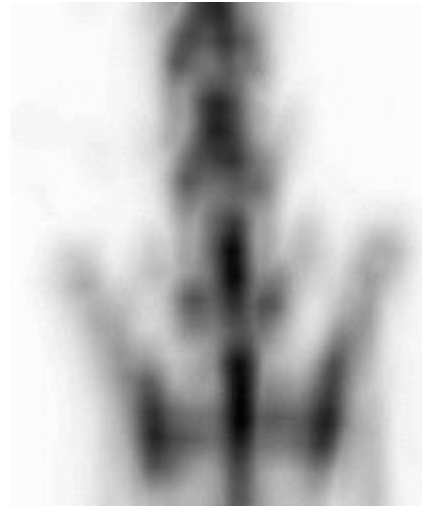

**Focus120  
(3D MAP,  $\beta = 0$ )**

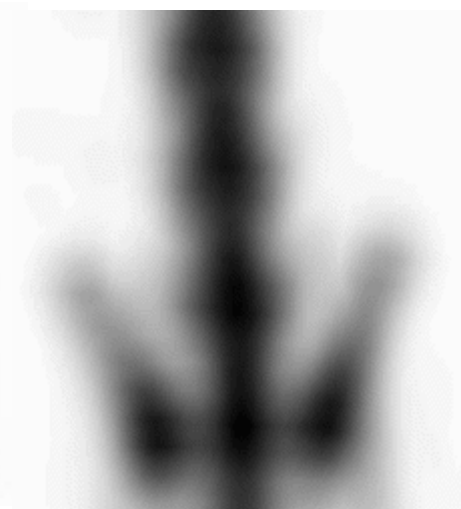

**Focus120  
(3D MAP,  $\beta = 1.98$ )**

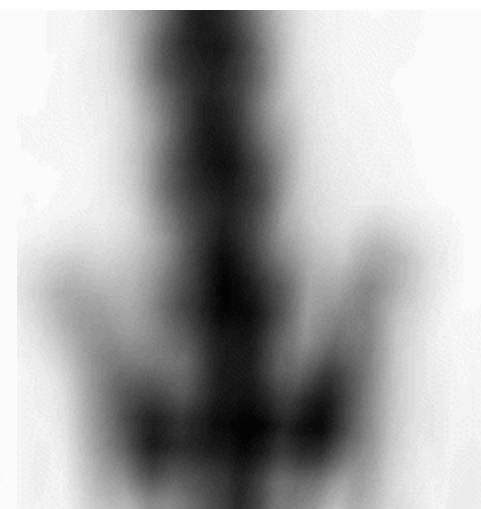

**Focus120  
(FORE + FBP)**

**Supplemental Figure 2.**
